# Supplementary material
Source: PubMed Central journal article supplement (PMC6741602)
Supplement: jin-0005-0581-s01.pdf [file jin-0005-0581-s01.pdf]

## SUPPLEMENTARY FIGURES

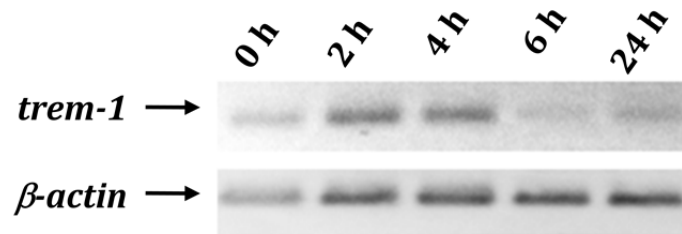

**Supplementary Figure 1:** Time-dependent up-regulation of *trem-1* mRNA in *S. pyogenes*-infected bone marrow-derived neutrophils. Neutrophils were infected with *S. pyogenes* at MOI of 10:1 for 1 h, washed and further incubated in the presence of gentamicin for the indicated period of time before isolating total RNA. At progressing times of infection, the induction of *trem-1* gene was determined by RT-PCR.  $\beta$ -actin expression serves as internal control.

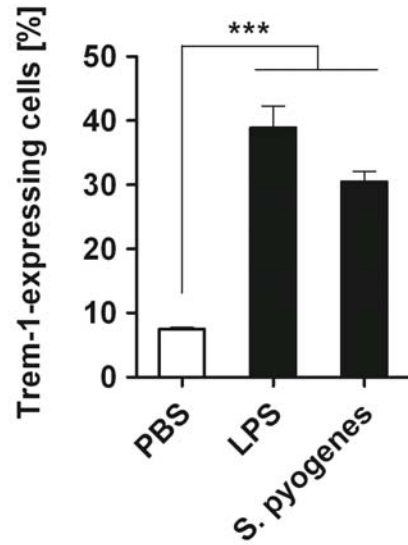

**Supplementary Figure 2:** Percentage of TREM-1 expressing cells isolated from the peritoneal cavity of mice 1 h after intraperitoneal injection of either  $10^5$  *S. pyogenes*, 1 $\mu$ g/ml LPS or PBS. Cell suspension was stained with PE-conjugated anti-TREM-1 antibodies and analysed by flow cytometry. \*\*\*,  $p < 0.001$ .

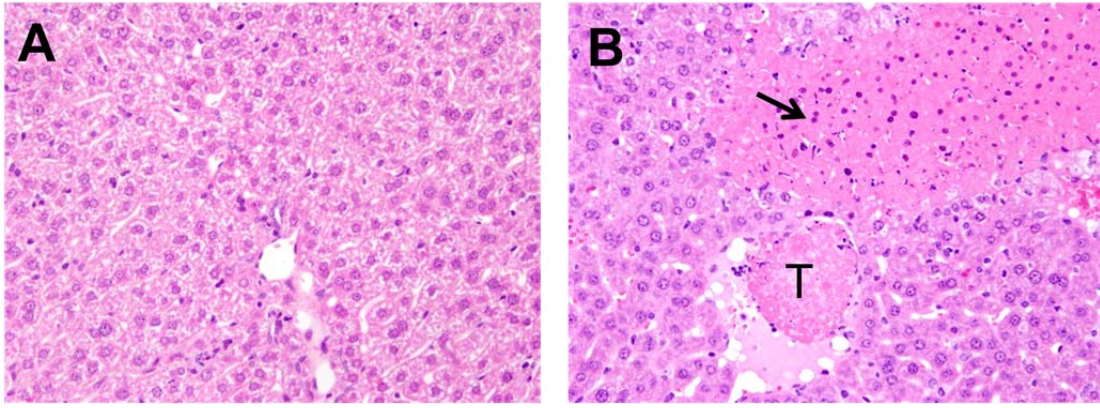

**Supplementary Figure 3:** Histopathological evaluation of liver tissue obtained from a LP17 treated (a) or scrambled LP17-control peptide treated (b) mouse at 48 h after bacterial inoculation. Notice the higher level of necrotic tissue (b, arrow) and thrombus formation (b, T) in the tissue of scrambled LP17-control peptide treated mice.
